# Supplementary material
Source: PubMed Central journal article supplement (PMC2882736)

## SUPPLEMENTAL FIGURE LEGENDS

**Supplemental Figure 1.** Assessment of JNK signaling in ATM<sup>+/+</sup> and ATM<sup>-/-</sup> thioglycollate-elicited peritoneal macrophages. Western blot analyses of phospho-JNK and total-JNK were performed using thioglycollate-elicited peritoneal macrophages derived from ATM<sup>+/+</sup> and ATM<sup>-/-</sup> (on apoE<sup>-/-</sup> background) mice. JNK activation was achieved by treatment with LPS (10 ng/ml) or TNF $\alpha$  (10 ng/ml) for the indicated times. Panel A shows representative Western blots. Panel B shows densitometric analyses of Western blots normalized to total JNK for the indicated time-points (\*p<0.05).

**Supplemental Figure 2.** Verification of the ability of chloroquine to activate the ATM-p53 axis *in vivo*. Western blots of fat tissue from p53<sup>+/+</sup> apoE<sup>-/-</sup> mice were performed after 2 months of chloroquine vs. saline control treatment.

**Supplemental Figure 3.** Effects of p53 deficiency and chloroquine treatment on overall body weight. p53<sup>+/+</sup> and p53<sup>-/-</sup> (on apoE<sup>-/-</sup> background) mice are denoted as WT and KO respectively. Sal = Saline and CHQ = Chloroquine treatment.

**Supplemental Figure 4.** Effects of p53 deficiency on insulin sensitivity *in vivo*. p53<sup>+/+</sup> and p53<sup>-/-</sup> (on apoE<sup>-/-</sup> background) are denoted as WT and KO respectively. These graphs represent data from Figure 4 that have been re-plotted in order to compare the (A) GTT and (B) ITT responses between WT and KO mice.

# Supplemental Figure 1

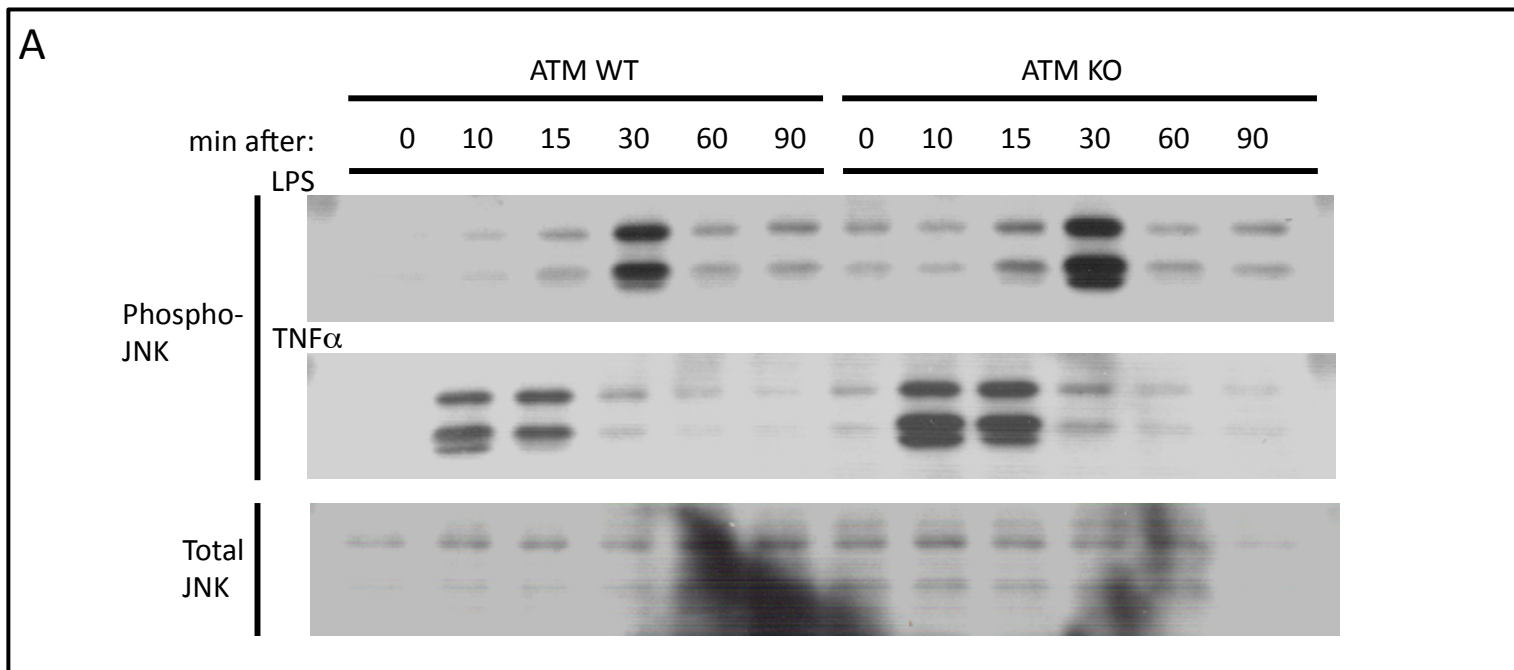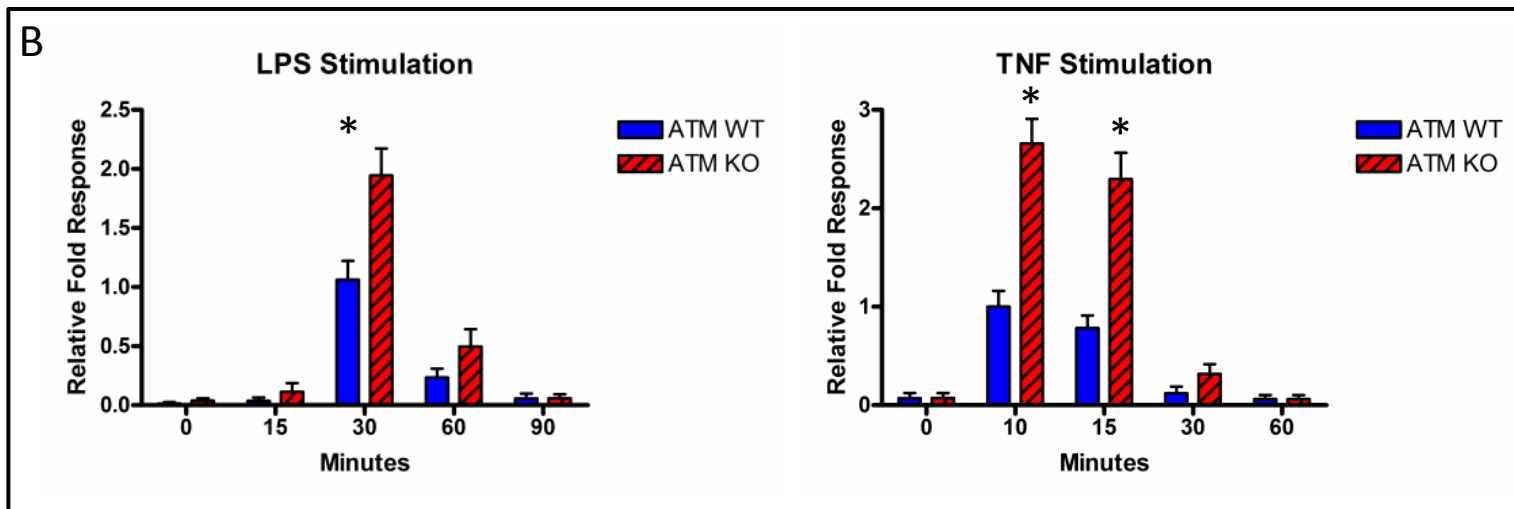

Supplemental Figure 2

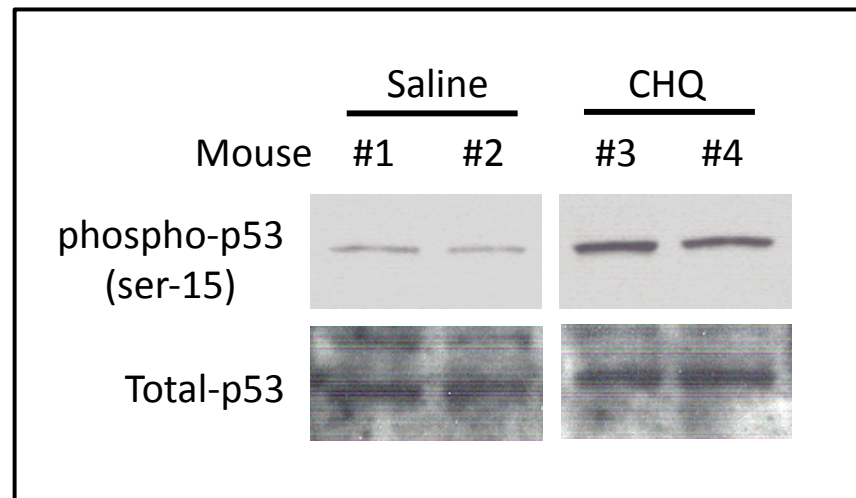

Supplemental Figure 3

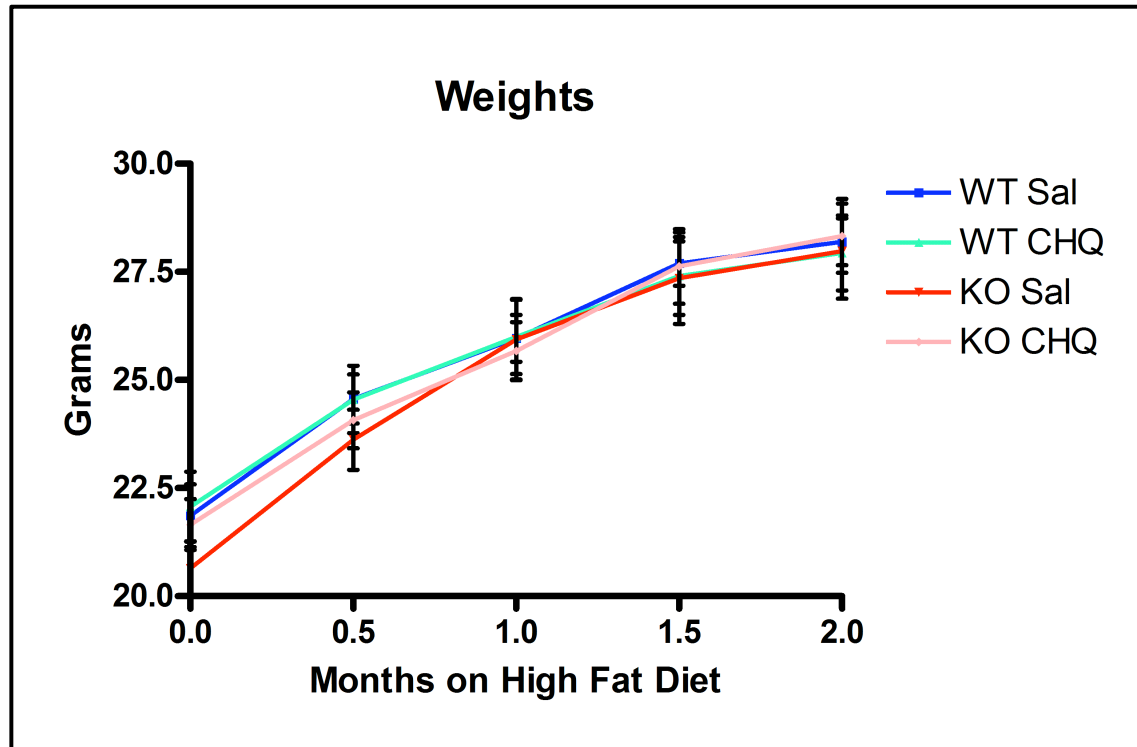

Supplemental Figure 4

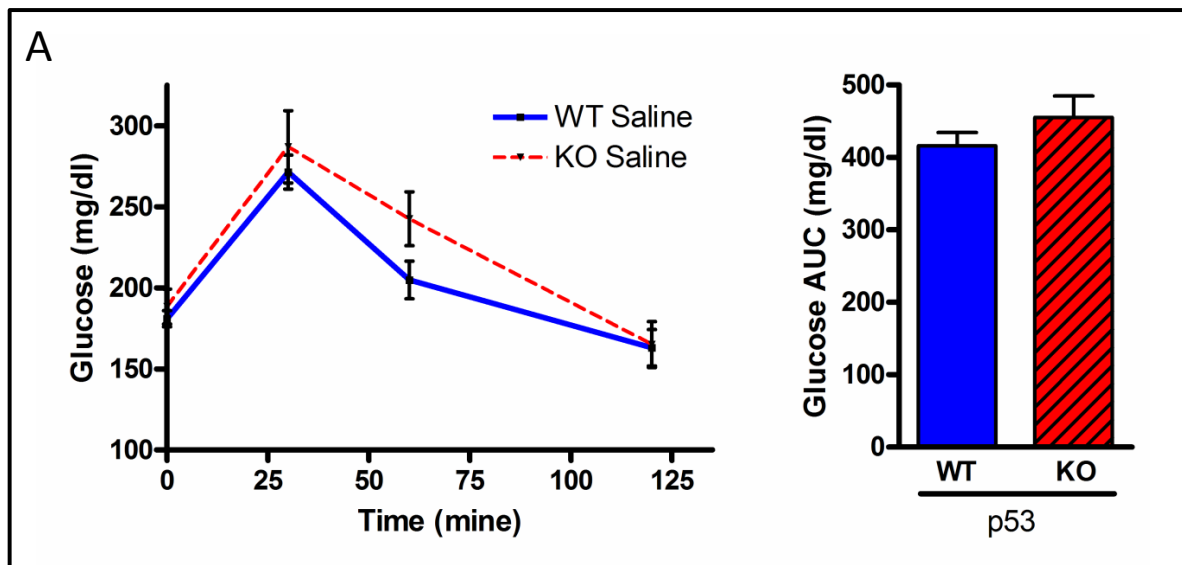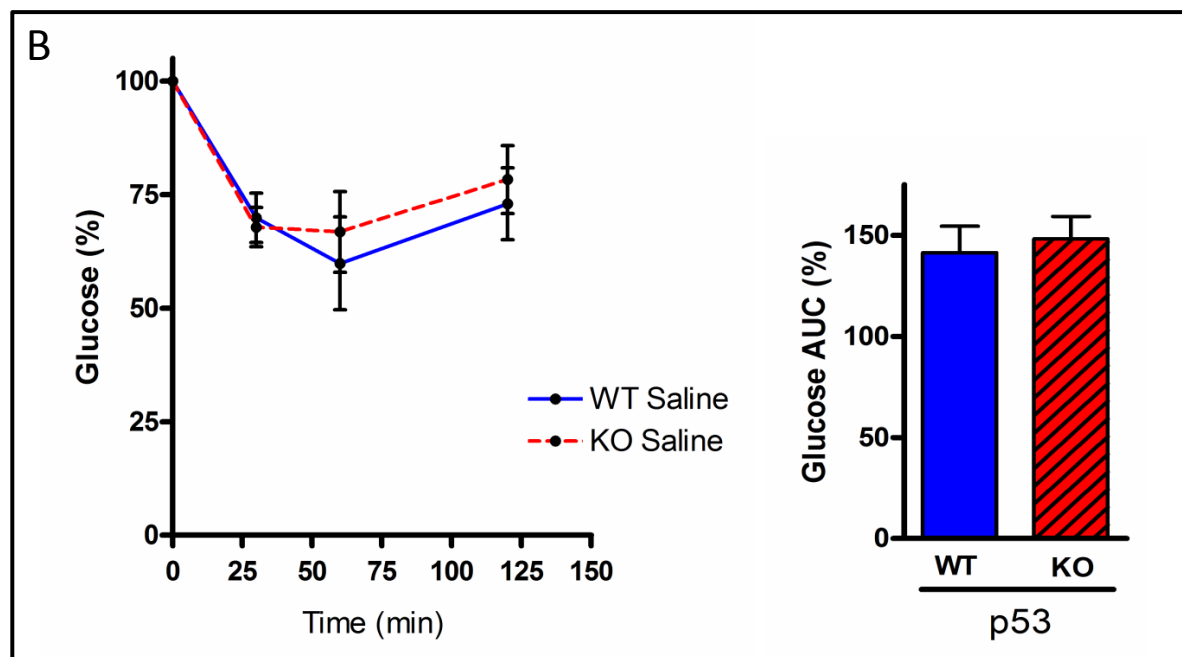

Supplement: supp_M003681_jlr.M003681-1.pdf [file supp_M003681_jlr.M003681-1.pdf]
